# Supplementary material for: Association between vision impairment and the risk of comorbidities of heart disease and depression: a population-based cohort study among middle-aged and older adults using the CHARLS 2018 data
Source: Research Square preprint supplement (doi:10.21203/rs.3.rs-7005878/v1), 2025-08-19
Supplement: Supplementary file 1 [file 43c98a9e94fcb68117e7babb.docx]

| Variables | Subgroup | Number |
| --- | --- | --- |
| Age | 45-59, ≥ 60 | BA002 |
| Gender | Male, Female | BA000_W2_3 |
| Nation | Han_Nationality, Hui_Nationality, Manchu, Miao_Nationality, Mongol_Nationality, Tibetan_Nationality, Tujia_Nationality, Uyghur_Nationality, Yi_Nationality, Zhuang_Nationality, Other | BG001_W4 |
| Residential_Address | Family_Housing, Hospital, Nursing_Home, Other | BB001_W3_1 |
| Education | Did_not_Finish_Primary_School, Elementary_School, Four-Year_College/Bachelor's_Degree, High_School, Master's_Degree, Middle_School, No_Formal_Education_(Illiterate), Sishu/Home_School, Two-/Three-Year_College/Associate_Degree, Vocational_School | BD001_W2_4 |
| Marital_status | Married, unmarried | BE001 |
| Hypertension | Yes, No | DA007_1 |
| Diabetes | Yes, No | DA007_3 |
| Chronic_Lung_Disease | Yes, No | DA007_5 |
| Liver_Disease | Yes, No | DA007_6 |
| Asthma | Yes, No | DA007_14 |
| Smoke | Yes, No, Quit | DA059, DA061 |
| Drunk | Drink_but_less_than_once_a_month, Drink_more_than_once_a_month, None_of_these | DA067 |

**The information of all covariates in the study**
